# Supplementary material for: Cost-Effectiveness of Lisocabtagene Maraleucel Versus Axicabtagene Ciloleucel and Tisagenlecleucel in the Third-Line or Later Treatment Setting for Relapsed or Refractory Large B-cell Lymphoma in the United States
Source: PubMed Central journal article supplement — Adv Ther. 2023 Mar 22;40(5):2355–74. doi: 10.1007/s12325-023-02444-x (PMC10129927; doi:10.1007/s12325-023-02444-x), 2023-03-22
Supplement: 12325_2023_2444_MOESM1_ESM.pdf [file 12325_2023_2444_MOESM1_ESM.pdf]

## Supplementary Material

### **Cost-effectiveness of Lisocabtagene Maraleucel Versus Axicabtagene Ciloleucel and Tisagenlecleucel for Treatment of Relapsed or Refractory Large B-Cell Lymphoma in the United States**

Christopher Parker<sup>1</sup> · Fei Fei Liu<sup>2</sup> · Kristen A. Deger<sup>3</sup> · Conrado Franco-Villalobos<sup>4</sup> · Irina Proskorovsky<sup>4</sup> · Scott J. Keating<sup>2</sup> · Sonja Sorensen<sup>3</sup>

<sup>1</sup>Bristol Myers Squibb, Uxbridge, UK; <sup>2</sup>Bristol Myers Squibb, Princeton, NJ, USA; <sup>3</sup>Evidence Synthesis, Modeling & Communication, Evidera Inc., Bethesda, MD, USA; <sup>4</sup>Evidence Synthesis, Modeling & Communication, Evidera Inc., Montreal, QC, Canada

Address correspondence to: Sonja Sorensen, MPH  
Vice President, Evidence Synthesis, Modeling & Communication  
Evidera Inc.  
Bethesda, MD 20814, USA  
Sonja.sorensen@evidera.com

**Table of Contents**

|                                                                                                                        |    |
|------------------------------------------------------------------------------------------------------------------------|----|
| Supplemental Material 1 Patient characteristic used for matching in the matching-adjusted indirect comparisons .....   | 3  |
| Supplemental Table 1 Patient characteristics and clinical factors adjusted for in the MAIC .....                       | 4  |
| Supplemental Material 2 Analysis of microcosting for cytokine release syndrome (CRS) and neurological events (NE)..... | 6  |
| Supplemental Table 2 Analysis of microcosting for CRS and NEs .....                                                    | 6  |
| Supplemental Table 3 Microcosting inputs for hypogammaglobulinemia .....                                               | 7  |
| Supplemental Material 3 Costing for adverse events .....                                                               | 8  |
| Supplemental Table 4 Unit cost for AEs.....                                                                            | 8  |
| Supplemental Material 4 Monitoring .....                                                                               | 9  |
| Supplemental Table 5 Monitoring frequency and unit costs.....                                                          | 9  |
| Supplemental Material 5 Deterministic sensitivity analysis (DSA) and probabilistic sensitivity analysis (PSA) .....    | 10 |
| Supplemental Material 6 Scenario analysis of liso-cel versus axi-cel and liso-cel versus tisa-cel .....                | 11 |
| Supplemental Table 6 Top 15 scenarios: liso-cel versus axi-cel.....                                                    | 11 |
| Supplemental Table 7 Top 15 scenario results: liso-cel versus tisa-cel.....                                            | 13 |
| Supplemental Material 7 Model results of health outcomes compared with published models ..                             | 15 |
| Supplemental Table 8 Comparison of model results with published models .....                                           | 15 |
| References.....                                                                                                        | 16 |

**Supplemental Material 1** Patient characteristic used for matching in the matching-adjusted indirect comparisons

Two pairwise unanchored matching-adjusted indirect comparisons (MAIC) were conducted comparing lisocabtagene maraleucel (liso-cel) to axicabtagene ciloleucel (axi-cel) and tisagenlecleucel (tisa-cel). Each MAIC produced a set of weights that can be applied to the TRANSCEND NHL 001 (TRANSCEND) population to reflect the patient population more closely in each of the relevant comparator trials. For the purposes of economic modeling, the MAIC weights were incorporated into the statistical analyses for extrapolating progression-free survival (PFS) and overall survival (OS) to derive relative treatment effect terms based on matched populations. For safety, the odds ratios resulting from each MAIC were applied to the liso-cel–naïve adverse event (AE) rates to derive AE rates for each comparator based on matched populations.

Full details of the MAIC methods have been previously published [1, 2]. Briefly, the methods and factors adjusted were as follows. Individual patient data (IPD) from TRANSCEND were adjusted to match the marginal distribution (e.g., mean, variance) of clinical factors among patients from each comparator trial (ZUMA-1 and JULIET) individually. Patients from TRANSCEND were removed from the IPD set if they did not satisfy eligibility criteria specified in the comparator trial for each MAIC. IPD for patients who remained in the TRANSCEND data set were then weighted using a method-of-moments propensity score model. Baseline characteristic and outcome definitions were aligned with those in each trial. Clinically relevant prognostic factors (identified from literature, TRANSCEND data, and five independent clinical experts) were adjusted collectively in a stepwise fashion by ranked order.

**Supplemental Table 1** Patient characteristics and clinical factors adjusted for in the MAIC

| Clinical factors adjusted for/matched                                                        | Axi-cel                                                      | Tisa-cel                                                     |
|----------------------------------------------------------------------------------------------|--------------------------------------------------------------|--------------------------------------------------------------|
|                                                                                              | ESS = 99                                                     | ESS = 49 <sup>a</sup>                                        |
| Bridging therapy                                                                             | Not adjusted in matching used for economic model             | No adjustment needed                                         |
| Disease histology                                                                            | Patients with FL3B or PMBCL were removed                     | Patients with FL3B were removed                              |
| ECOG PS                                                                                      | Patients with ECOG PS of 2 were removed                      | Patients with ECOG PS of 2 were removed                      |
| Secondary CNS lymphoma                                                                       | Patients with secondary CNS lymphoma were removed            | Patients with secondary CNS lymphoma were removed            |
| Prior allogeneic HSCT                                                                        | Patients who had received prior allogeneic HSCT were removed | Patients who had received prior allogeneic HSCT were removed |
| Disease histology                                                                            | ✓                                                            | ✓                                                            |
| Tumor burden – sum of the products of perpendicular diameters before lymphodepleting therapy | ✓                                                            |                                                              |
| ECOG PS score                                                                                | ✓                                                            | ✓                                                            |
| Tumor burden – bulky disease                                                                 | ✓                                                            |                                                              |
| IPI score                                                                                    | ✓                                                            | ✓                                                            |
| R/R status to last therapy                                                                   | ✓                                                            | ✓                                                            |
| Age                                                                                          | ✓                                                            | ✓                                                            |
| Prior auto-HSCT                                                                              | ✓                                                            | ✓                                                            |
| Disease stage                                                                                | ✓                                                            | ✓                                                            |
| Creatinine clearance                                                                         | ✓                                                            | ✓ <sup>c</sup>                                               |
| Tumor burden – extranodal disease                                                            | ✓                                                            |                                                              |
| Prior number of therapies                                                                    | ✓                                                            | ✓                                                            |
| LVEF                                                                                         | ✓                                                            | ✓ <sup>c</sup>                                               |
| Sex                                                                                          | ✓                                                            |                                                              |
| Pre-leukemia absolute lymphocyte count                                                       | ✓                                                            | ✓ <sup>b</sup>                                               |

*Axi-cel* axicabtagene ciloleucel, *CNS* central nervous system, *ECOG PS* Eastern Cooperative Oncology Group performance status, *ESS* effective sample size, *FL3B* follicular lymphoma grade 3B, *HSCT* hematopoietic stem cell transplantation, *IPI* International Prognostic Index, *LVEF* left

ventricular ejection fraction, *MAIC* matching-adjusted indirect comparisons, *OS* overall survival, *PFS* progression-free survival, *PMBCL* primary mediastinal B-cell lymphoma, *R/R* relapsed or refractory, *tisa-cel*/tisagenlecleucel

<sup>a</sup>Different ESS were used for OS (ESS = 49, rounded from 49.30) and PFS (ESS = 48, rounded from 47.52) owing to comparison with the JULIET trial involving different rank order of factors for OS and PFS

<sup>b</sup>Included only in the OS scenario

<sup>c</sup>Included only in the PFS scenario

**Supplemental Material 2** Analysis of microcosting for cytokine release syndrome (CRS) and neurological events (NE)

CRS, NEs, and hypogammaglobulinemia are events of special interest for chimeric antigen receptor (CAR) T cell therapies. These events require vigilant monitoring, aggressive supportive treatments, and occasionally intensive care [3]. Accordingly, all-grade CRS, NEs, and hypogammaglobulinemia events were included in the model, irrespective of incidence. These AEs were microcosted based on drug costs in treating and managing them, along with any associated hospital or inpatient stay.

**Supplemental Table 2** Analysis of microcosting for CRS and NEs

| AE                 | Cost, USD | Source                                                           |
|--------------------|-----------|------------------------------------------------------------------|
| CRS grade $\geq 3$ | 59,737    | Liso-cel CRS and neurotoxicity analysis, BLA data-cut<br>USPI AE |
| CRS grade 1–2      | 9232      |                                                                  |
| NEs grade $\geq 3$ | 13,401    |                                                                  |
| NEs grade 1–2      | 6779      |                                                                  |

*AE* adverse event, *BLA* Biologics License Application, *CRS* cytokine release syndrome, *liso-cel* lisocabtagene maraleucel, *NE* neurological event, *USD* United States dollars, *USPI* United States prescribing information

**Supplemental Table 3** Microcosting inputs for hypogammaglobulinemia

| Drug cost: intravenous immunoglobulins |                           |                                  |                   |                               |                                |
|----------------------------------------|---------------------------|----------------------------------|-------------------|-------------------------------|--------------------------------|
|                                        | Cost per unit, USD<br>[4] | Concentration per<br>unit        | Tablet/ vial size | Administration route          | Cost per mg, USD               |
| Unit cost                              | 47                        | 500 mg                           | 1 vial            | IV                            | 0.09                           |
|                                        | Dosing                    | Frequency                        | Duration          | Drug cost per<br>episode, USD | Admin cost per<br>episode, USD |
| Hypogammaglobulinemia grade<br>≥3      | 0.5 g/kg [5, 6]           | Every 4 weeks                    | 11.4 months       | 45,934                        | 5304                           |
| Hypogammaglobulinemia grade<br>1–2     | 400 mg/kg [5, 6]          | Every 4 weeks                    | 4.5 months        | 14,505                        | 2094                           |
| Management cost                        | Cost, USD                 | Notes                            |                   |                               |                                |
| Hypogammaglobulinemia grade<br>≥3      | 9410 [7]                  |                                  |                   |                               |                                |
| Hypogammaglobulinemia grade<br>1–2     | 84 [8]                    | Assume the cost<br>of a GP visit |                   |                               |                                |

*GP* general practitioner, *IV* intravenous, *USD* United States Dollars

**Supplemental Material 3** Costing for adverse events

All other AEs were costed using data extracted from the Healthcare Cost and Utilization Project (HCUP) database. Grade  $\geq 3$  AE costs are presented below. The corresponding grade 1–2 AEs were assumed to have required a single general practitioner (GP) visit (\$84) [8].

**Supplemental Table 4** Unit cost for AEs

|                     | Grade $\geq 3$ AEs            |
|---------------------|-------------------------------|
|                     | Average cost per episode, USD |
| Infections          | 10,507                        |
| Prolonged cytopenia | 16,566                        |
| Febrile neutropenia | 21,916                        |
| Anemia              | 7872                          |
| Fatigue             | 7999                          |
| Hypertension        | 8358                          |
| Hypotension         | 7042                          |
| Hypoxia             | 9154                          |
| Leukopenia          | 4040                          |
| Lymphopenia         | 4040                          |
| Neutropenia         | 12,396                        |
| Pyrexia             | 7592                          |
| Thrombocytopenia    | 11,890                        |

*AE* adverse event, *USD* United States Dollars



**Supplemental Material 4** Monitoring

The phases of monitoring included 28 days after CAR T-cell infusion, progression free, progression free for more than 2 years, and after progression. The types and frequencies of monitoring associated with each phase were informed based on internal Bristol Myers Squibb clinical assumption in the absence of published or long-term observational data. Resource use for patients in the third-line or later (3L+) PFS state is relatively intensive for the first few years, particularly 28 days after infusion; for patients who remain in the PFS state beyond 2 years, resource use becomes less frequent, reflecting that these patients are no longer expected to be at risk of progression or death from disease. Patients who progress require less monitoring care (vs the PFS state) until the end of the time horizon.

**Supplemental Table 5** Monitoring frequency and unit costs

| Monitoring type       | Unit cost, USD [8] | Unit(s) per year                        |                      |                  |                      |                                        |                   |
|-----------------------|--------------------|-----------------------------------------|----------------------|------------------|----------------------|----------------------------------------|-------------------|
|                       |                    | Intensive: up to 28 days after infusion |                      | Progression free |                      | Patients progression free for >2 years | After progression |
|                       |                    | CAR T cells                             | Salvage chemotherapy | CAR T cells      | Salvage chemotherapy |                                        |                   |
| Cancer nurse          | 52                 | 12                                      | 0                    | 0                | 0                    | 0                                      | 4                 |
| Oncology visit        | 175                | 12                                      | 0                    | 4                | 4                    | 2                                      | 4                 |
| Complete blood count  | 37                 | 12                                      | 0                    | 4                | 4                    | 2                                      | 0                 |
| Liver function test   | 49                 | 12                                      | 0                    | 4                | 4                    | 2                                      | 4                 |
| Lactate dehydrogenase | 34                 | 12                                      | 0                    | 4                | 4                    | 2                                      | 4                 |
| Coagulation panel     | 180                | 12                                      | 0                    | 4                | 4                    | 2                                      | 0                 |
| Inflammatory markers  | 121                | 12                                      | 0                    | 4                | 4                    | 2                                      | 0                 |
| Immunoglobulins       | 73                 | 0                                       | 0                    | 4                | 4                    | 2                                      | 0                 |
| CT scan               | 622                | 0                                       | 0                    | 4                | 4                    | 2                                      | 2                 |
| PET scan              | 622                | 0                                       | 0                    | 2                | 2                    | 0                                      | 0                 |
| Total cost, USD       |                    | 7776                                    | 0                    | 6408             | 6408                 | 2582                                   | 2484              |

CAR chimeric antigen receptor, CT computed tomography, PET positron emission tomography; USD United States Dollars

**Supplemental Material 5** Deterministic sensitivity analysis (DSA) and probabilistic sensitivity analysis (PSA)

In the DSA, the lower and upper bounds of a parameter were based on the 95% confidence intervals (CI). If no CI was available, the bounds were assumed to be within  $\pm 10\%$  of the base-case value. PSA was performed by simultaneously varying multiple parameters using a Markov chain Monte Carlo simulation with 1000 replications. Values for each parameter were sampled using statistical distributions chosen to best match the data type (e.g., beta distribution for utilities and probabilities to restrict between 0 and 1, gamma distribution for costs to restrict to 0 and positive values, Dirichlet distribution for proportions adding to 100%). Standard errors (SE) used in the PSA distributions were informed directly from the input source; if unavailable, they were calculated from the standard deviation (SD) and sample size or CIs; and, if none of those estimates were available, the SE was assumed to be 10% of the mean. Uncertainty in the survival projections and health state utilities was captured in the variance-covariance matrices from the statistical analyses and applied using the Cholesky decomposition approach.

Two key scenarios focused on differences between the CAR T-cell therapy trials. The first assumed that all patients received their CAR T-cell infusion, as this may differ in clinical practice to the trials. The second explored the impact of potential bias resulting from a difference in the ZUMA-1 and TRANSCEND designs regarding bridging therapy use. This scenario compared liso-cel with axi-cel using an MAIC that matched on bridging (i.e., excluding patients from TRANSCEND who received bridging therapy). In this scenario, PFS and OS curves for axi-cel were derived by applying hazard ratios (HR) from an update of the analysis by Maloney et al. [1] (PFS HR = 0.94; OS HR = 0.91) to the liso-cel reference curves.

**Supplemental Material 6** Scenario analysis of liso-cel versus axi-cel and liso-cel versus tisa-cel

Scenario analyses were performed to assess the impact of a specific scenario or model assumption on results. Selected model parameters were varied (e.g., exploring alternative distributions), using alternative literature-based values or clinical expert assumptions versus the TRANSCEND trial, among others.

**Supplemental Table 6** Top 15 scenarios: liso-cel versus axi-cel

| Rank | Scenario name                                                  | Base-case value or setting        | Scenario setting                                                                                                                                                                            | INMB, USD        | Percentage change from base-case INMB, % |
|------|----------------------------------------------------------------|-----------------------------------|---------------------------------------------------------------------------------------------------------------------------------------------------------------------------------------------|------------------|------------------------------------------|
|      | Base case                                                      |                                   |                                                                                                                                                                                             | 75,170           | —                                        |
| 1    | Comparative efficacy source for OS and PFS                     | MAIC-derived comparative efficacy | Naïve comparison:<br>liso-cel: gamma (OS), loglogistic (PFS)<br>tisa-cel: gamma (OS), loglogistic (PFS)<br>axi-cel: gamma (OS), loglogistic (PFS)<br>salvage chemotherapy: loglogistic (OS) | 50,563           | -32.7                                    |
| 2    | Efficacy for patients receiving liso-cel out of specifications | Assume same efficacy as liso-cel  | Assume same efficacy as salvage chemotherapy                                                                                                                                                | 57,002           | -24.2                                    |
| 3    | Pretreatment patient flow                                      | As observed in trials             | All patients receive CAR T cells                                                                                                                                                            | 58,244           | -22.5                                    |
| 4    | Source for AE rates for all treatment                          | MAIC-derived AE rates             | Observed AE rates                                                                                                                                                                           | 59,106           | -21.4                                    |
| 5    | AE costing approach                                            | Microcosting                      | Average costs based on HCUP [7]                                                                                                                                                             | 63,479           | -15.6                                    |
| 6    | Projection approach for axi-cel (MAIC HR vs liso-cel)          | Projection with MCM fittings      | HR matching on bridging vs liso-cel                                                                                                                                                         | 85,950           | 14.3                                     |
| 7    | Alternative MAIC-based OS fittings                             | Gamma for all treatment arms      | Weibull for all treatment arms<br>Exponential for all treatment arms                                                                                                                        | 71,998<br>66,521 | -4.2<br>-11.5                            |
| 8    | Health state utilities                                         | Based on TRANSCEND NHL 001:       | Based on axi-cel [9] and PV NICE [10] submissions:                                                                                                                                          | 73,834           | -1.8                                     |

| Rank | Scenario name                                                      | Base-case value or setting                                                                                                  | Scenario setting                                                                                                                                                                                | INMB, USD        | Percentage change from base-case INMB, % |
|------|--------------------------------------------------------------------|-----------------------------------------------------------------------------------------------------------------------------|-------------------------------------------------------------------------------------------------------------------------------------------------------------------------------------------------|------------------|------------------------------------------|
|      |                                                                    | pretreatment: 0.764; initial PFS: 0.831; progressed disease: 0.764                                                          | pretreatment: 0.647; initial PFS: 0.722; progressed disease: 0.647<br>Lower progressed disease value based on Whittington et al. 2019 [11] publication: 0.390 (reduction of PFS value by 0.443) | 67,258           | -10.5                                    |
| 9    | Proportion receiving bridging therapy based on real-world evidence | Liso-cel: 59%<br>Tisa-cel: 92%<br>Axi-cel: 0%                                                                               | Liso-cel: 59%<br>Tisa-cel: 92%<br>Axi-cel: 53%                                                                                                                                                  | 81,276           | 8.1                                      |
| 10   | AE decrements for CRS and neurotoxicity                            | Decrement for CRS based on Howell et al. 2022 [12];<br>Decrement for neurotoxicity based on TRANSCEND (0.152 for 37.2 days) | CRS assumed the same as progression-free (assumption in axi-cel NICE submission [9])<br>Neurotoxicity = 0.178 applied for 365 days per Howell et al. 2022 [12]                                  | 79,895           | 6.3                                      |
| 11   | Discount rate for health outcomes                                  | 3%                                                                                                                          | 0%<br>5%                                                                                                                                                                                        | 77,297<br>74,383 | 2.8<br>-1.0                              |
| 12   | Time horizon                                                       | Lifetime                                                                                                                    | 10 years<br>25 years                                                                                                                                                                            | 73,366<br>74,918 | -2.4<br>-0.3                             |
| 13   | Discount rate for cost outcomes                                    | 3%                                                                                                                          | 0%<br>5%                                                                                                                                                                                        | 74,798<br>75,395 | -0.5<br>0.3                              |
| 14   | IVIG use                                                           | Based on incidence of hypogammaglobulinemia                                                                                 | Based on all IVIG use in TRANSCEND                                                                                                                                                              | 75,763           | 0.8                                      |
| 15   | Cutoff for long-term remission assumptions                         | 2 years                                                                                                                     | 5 years                                                                                                                                                                                         | 75,638           | 0.6                                      |

*AE* adverse event, *axi-cel* axicabtagene ciloleucel, *CAR* chimeric antigen receptor, *CRS* cytokine release syndrome, *HCUP* Healthcare Cost and Utilization Project, *HR* hazard ratio, *INMB* incremental net monetary benefit, *IVIG* intravenous immunoglobulin, *liso-cel* lisocabtagene maraleucel, *MAIC* matching-adjusted indirect comparison, *MCM* mixture cure model, *NICE* National Institute for Health and Care Excellence, *OS* overall survival, *PFS* progression-free survival, *PV* Polatuzumab vedotin, *tisa-cel* tisagenlecleucel, *USD* United States Dollars

**Supplemental Table 7** Top 15 scenario results: liso-cel versus tisa-cel

| Rank | Scenario name                                                  | Base-case value or setting                                                             | Scenario setting                                                                                                                                                                                                                                          | INMB, USD              | Percentage change from base-case INMB, % |
|------|----------------------------------------------------------------|----------------------------------------------------------------------------------------|-----------------------------------------------------------------------------------------------------------------------------------------------------------------------------------------------------------------------------------------------------------|------------------------|------------------------------------------|
|      | Base case                                                      |                                                                                        |                                                                                                                                                                                                                                                           | 134,125                | —                                        |
| 1    | Discount rate for health outcomes                              | 3%                                                                                     | 0%                                                                                                                                                                                                                                                        | 222,470                | 65.9%                                    |
|      |                                                                |                                                                                        | 5%                                                                                                                                                                                                                                                        | 95,546                 | -28.8                                    |
| 2    | Time horizon                                                   | Lifetime                                                                               | 10 years                                                                                                                                                                                                                                                  | 49,862                 | -62.8                                    |
|      |                                                                |                                                                                        | 25 years                                                                                                                                                                                                                                                  | 122,371                | -8.8                                     |
| 3    | Comparative efficacy source for OS and PFS                     | MAIC-derived comparative efficacy                                                      | Naïve comparison:<br>liso-cel: gamma (OS), loglogistic (PFS)<br>tisa-cel: gamma (OS), loglogistic (PFS)<br>axi-cel: gamma (OS), loglogistic (PFS)<br>salvage chemotherapy: loglogistic (OS)                                                               | 66,727                 | -50.2                                    |
| 4    | Pretreatment patient flow                                      | As observed in trials                                                                  | All patients receive CAR T cells                                                                                                                                                                                                                          | 186,548                | 39.1                                     |
| 5    | Efficacy for patients receiving liso-cel out of specifications | Assume same efficacy as liso-cel                                                       | Assume same efficacy as salvage chemotherapy                                                                                                                                                                                                              | 115,957                | -13.5                                    |
| 6    | Excess mortality for cured patients vs general population      | SMR 1.40 for first 2 years followed by 1.18 [13]                                       | SMR 1.40 for the first 2 years [13]<br>SMR 1.56 for the first 5 years [14]                                                                                                                                                                                | 143,819<br>138,880     | 7.2<br>3.5                               |
| 7    | Alternative MAIC-based OS fittings                             | Gamma for all treatment arms                                                           | OS projected using Weibull fittings for all treatment arms<br>OS projected using exponential fittings for all treatment arms                                                                                                                              | 132,450<br>128,664     | -1.2<br>-4.1                             |
| 8    | Health state utilities                                         | Based on TRANSCEND: pretreatment: 0.764; initial PFS: 0.831; progressed disease: 0.764 | Based on axi-cel [9] and PV NICE [10] submissions:<br>pretreatment: 0.647; initial PFS: 0.722; progressed disease: 0.647<br><br>Lower progressed disease value based on Whittington et al. 2019 [11] publication: 0.390 (reduction of PFS value by 0.443) | 129,293<br><br>128,919 | -3.6<br><br>-3.9                         |
| 9    |                                                                | 3%                                                                                     | 0%                                                                                                                                                                                                                                                        | 130,673                | -2.6                                     |

| Rank | Scenario name                                                         | Base-case value or setting                                                                                                  | Scenario setting                                                                                                                                               | INMB, USD              | Percentage change from base-case INMB, % |
|------|-----------------------------------------------------------------------|-----------------------------------------------------------------------------------------------------------------------------|----------------------------------------------------------------------------------------------------------------------------------------------------------------|------------------------|------------------------------------------|
|      | Discount rate for cost outcomes                                       |                                                                                                                             | 5%                                                                                                                                                             | 135,497                | 1.0                                      |
| 10   | AE costing approach                                                   | Microcosting                                                                                                                | Average costs based on HCUP [7]                                                                                                                                | 131,313                | -2.1                                     |
| 11   | Source for AE rates for all treatment                                 | MAIC-derived AE rates                                                                                                       | Observed AE rates                                                                                                                                              | 136,875                | 2.1                                      |
| 12   | Cutoff for long-term remission assumptions                            | 2 years                                                                                                                     | 5 years                                                                                                                                                        | 132,623                | -1.1                                     |
| 13   | AE decrements for CRS and neurotoxicity                               | Decrement for CRS based on Howell et al. 2022 [12];<br>Decrement for neurotoxicity based on TRANSCEND (0.152 for 37.2 days) | CRS assumed the same as progression free (assumption in axi-cel NICE submission [9])<br>Neurotoxicity = 0.178 applied for 365 days per Howell et al. 2022 [12] | 133,013                | -0.8                                     |
| 14   | Alternative MAIC-based PFS fittings                                   | Loglogistic for all treatment arms                                                                                          | PFS projected using Lognormal fittings for all treatment arms<br><br>PFS projected using generalized gamma fittings for all treatment arms                     | 134,011<br><br>133,679 | -0.1<br><br>-0.3                         |
| 15   | Proportion receiving liso-cel administration in an outpatient setting | 9.3%                                                                                                                        | 0%                                                                                                                                                             | 133,790                | -0.2                                     |

*AE* adverse event, *axi-cel* axicabtagene ciloleucel, *CAR* chimeric antigen receptor, *CRS* cytokine release syndrome, *HCUP* Healthcare Cost and Utilization Project, *liso-cel* lisocabtagene maraleucel, *MAIC* matching-adjusted indirect comparison, *NICE* National Institute for Health and Care Excellence, *OS* overall survival, *PFS* progression-free survival, *SMR* (Standardized Mortality Ratio), *tisa-cel* tisagenlecleucel; *USD* United States Dollars

**Supplemental Material 7** Model results of health outcomes compared with published models

The model results were compared with results reported in relevant published studies in the United States (US) where possible. The base-case outcomes for axi-cel and tisa-cel resulting from this analysis are aligned with other published models for diffuse large B-cell lymphoma in the US. Only US studies were considered for this comparison and verification to remain consistent from a patient health perspective (e.g., patient lifestyle, characteristics, and treatment practices) and also an economic modeling perspective (e.g., discounting). The published economic analyses were identified from a systematic literature review that was performed in early 2021. The systematic literature review was performed in accordance with the *Cochrane Handbook for Systematic Reviews of Interventions* [15] and reported in alignment with the Preferred Reporting Items for Systematic Literature Reviews and Meta-Analyses (also known as PRISMA) guidelines [16]. The database searches were restricted to the publication years 1 January 2003 to 5 February 2021. An additional targeted search was conducted in March 2022 to identify any US-based economic analyses published since February 2021; two studies were identified (Qi et al. 2021 [17] and Liu et al. 2021 [18]).

**Supplemental Table 8** Comparison of model results with published models

|                                         | Axi-cel                      |                  | Tisa-cel                   |                  |
|-----------------------------------------|------------------------------|------------------|----------------------------|------------------|
|                                         | Discounted LYs               | Discounted QALYs | Discounted LYs             | Discounted QALYs |
| Current analysis                        | 6.22                         | 5.09             | 3.75                       | 3.07             |
| Roth et al. 2018 [19]                   | 9.49                         | 7.67             | —                          | —                |
| Whittington et al. 2019 [11]            | 9.19                         | 7.62             | —                          | —                |
| ICER model for B-cell lymphoma 2008 [6] | 7.35                         | 5.87             | —                          | —                |
| Qi et al. 2021 [17]                     | —                            | —                | —                          | 3.35             |
| Lin et al. 2019 [20] <sup>a</sup>       | 9.11—11.80<br>(undiscounted) | 4.28—5.50        | 5.9—8.25<br>(undiscounted) | 2.82—3.92        |
| Liu et al. 2021 [18]                    | 9.47                         | 7.47             | 6.73                       | 5.16             |

ICER Institute for Clinical and Economic Review, LY life-year, PFS progression-free survival, QALY quality-adjusted life-year, tisa-cel tisagenlecleucel

<sup>a</sup>A range was reported assuming 20%, 30%, and 40% 5-year PFS. LYs were not discounted

## References

1. Maloney DG, Kuruvilla J, Liu FF, Kostic A, Kim Y, Bonner A, et al. Matching-adjusted indirect treatment comparison of liso-cel versus axi-cel in relapsed or refractory large B cell lymphoma. *J Hematol Oncol*. 2021;14:140.
2. Cartron G, Fox CP, Liu FF, Kostic A, Hasskarl J, Li D, et al. Matching-adjusted indirect treatment comparison of chimeric antigen receptor T-cell therapies for third-line or later treatment of relapsed or refractory large B-cell lymphoma: lisocabtagene maraleucel versus tisagenlecleucel. *Exp Hematol Oncol*. 2022;11:17.
3. Brudno JN, Kochenderfer JN. Toxicities of chimeric antigen receptor T cells: recognition and management. *Blood*. 2016;127:3321–30.
4. IBM. IBM Micromedex RED BOOK. 2020. <https://www.ibm.com/products/micromedex-red-book>. Accessed 18 Apr 2022.
5. Compagno N, Malipiero G, Cinetto F, Agostini C. Immunoglobulin replacement therapy in secondary hypogammaglobulinemia. *Front Immunol*. 2014;5:626.
6. Institute for Clinical and Economic Review. Chimeric antigen receptor T-cell therapy for B-cell cancers: effectiveness and value. 2018. <https://collections.nlm.nih.gov/catalog/nlm:nlmuid-101744954-pdf>. Accessed 18 Apr 2022.
7. Agency for Healthcare Research and Quality. Healthcare Cost and Utilization Project: weighted national estimates from HCUP National (Nationwide) Inpatient Sample (NIS), 2017; inflated to 2020. 2017. <https://hcupnet.ahrq.gov/#setup>. Accessed 18 Apr 2022.
8. InHealth Professional Services. Physicians' Fee & Coding Guide. Atlanta, GA: InHealth Record Systems; 2019.
9. National Institute for Health and Care Excellence (NICE). Axicabtagene ciloleucel for treating diffuse large B-cell lymphoma and primary mediastinal large B-cell lymphoma after 2 or more systemic therapies: technology appraisal guidance [TA559]. 2019. <https://www.nice.org.uk/guidance/ta559>. Accessed 18 Apr 2022.
10. National Institute for Health and Care Excellence (NICE). Polatuzumab vedotin with rituximab and bendamustine for treating relapsed or refractory diffuse large B-cell lymphoma: technology appraisal guidance [TA649]. 2020. <https://www.nice.org.uk/guidance/ta649>. Accessed 19 Apr 2022.
11. Whittington MD, McQueen RB, Ollendorf DA, Kumar VM, Chapman RH, Tice JA, et al. Long-term survival and cost-effectiveness associated with axicabtagene ciloleucel vs chemotherapy for treatment of B-cell lymphoma. *JAMA Netw Open*. 2019;2:e190035.
12. Howell TA, Matza LS, Jun MP, Garcia J, Powers A, Maloney DG. Health state utilities for adverse events associated with chimeric antigen receptor T-cell therapy in large B-cell lymphoma. *Pharmacoecon Open*. 2022; doi:10.1007/s41669-021-00316-0.
13. Maurer MJ, Ghesquières H, Jais JP, Witzig TE, Haioun C, Thompson CA, et al. Event-free survival at 24 months is a robust end point for disease-related outcome in diffuse large B-cell lymphoma treated with immunochemotherapy. *J Clin Oncol*. 2014;32:1066–73.
14. Howlader N, Mariotto AB, Besson C, Suneja G, Robien K, Younes N, et al. Cancer-specific mortality, cure fraction, and noncancer causes of death among diffuse large B-cell lymphoma patients in the immunochemotherapy era. *Cancer*. 2017;123:3326–34.
15. Higgins JPT, Green S. Cochrane handbook for systematic reviews of interventions version 5.1.0. In. Chichester, UK: John Wiley & Sons; 2011.



16. Moher D, Liberati A, Tetzlaff J, Altman DG, Group P. Preferred reporting items for systematic reviews and meta-analyses: the PRISMA statement. *PLoS Med.* 2009;6:e1000097.
17. Qi CZ, Bollu V, Yang H, Dalal A, Zhang S, Zhang J. Cost-effectiveness analysis of tisagenlecleucel for the treatment of patients with relapsed or refractory diffuse large B-cell lymphoma in the United States. *Clin Ther.* 2021;43:1300–19.e8.
18. Liu R, Oluwole OO, Diakite I, Botteman MF, Snider JT, Locke FL. Cost effectiveness of axicabtagene ciloleucel versus tisagenlecleucel for adult patients with relapsed or refractory large B-cell lymphoma after two or more lines of systemic therapy in the United States. *J Med Econ.* 2021;24:458–68.
19. Roth JA, Sullivan SD, Lin VW, Bansal A, Purdum AG, Navale L, et al. Cost-effectiveness of axicabtagene ciloleucel for adult patients with relapsed or refractory large B-cell lymphoma in the United States. *J Med Econ.* 2018;21:1238–45.
20. Lin JK, Muffly LS, Spinner MA, Barnes JI, Owens DK, Goldhaber-Fiebert JD. Cost effectiveness of chimeric antigen receptor T-cell therapy in multiply relapsed or refractory adult large B-cell lymphoma. *J Clin Oncol.* 2019;37:2105–19.
